# Supplementary material for: Extensive Association of Functionally and Cytotopically Related mRNAs with Puf Family RNA-Binding Proteins in Yeast
Source: PLoS Biol. 2004 Mar 16;2(3):e79. doi: 10.1371/journal.pbio.0020079 (PMC368173; doi:10.1371/journal.pbio.0020079)
Supplement: Table S6 — Notations are as in Table S5. (61 KB XLS). [file pbio.0020079.st006.xls]

## Sheet: Puf4_data
YORF	GENE	Process	Function	Compartment	Fraction	mean log2 ratio	stdev	cross reaction	MEME puf4_motif	copy number (Wang)	copy number (Holstege)
YBR266C		endocytosis	molecular_function unknown	cellular_component unknown		4.99333	0.528425			1.5	nd
YDR361C	BCP1	biological_process unknown	molecular_function unknown	cellular_component unknown		4.92333	0.625806		3'UTR	2.7	1.7
YLR355C	ILV5	mitochondrial genome maintenance*	ketol-acid reductoisomerase activity	mitochondrion	soluble	4.8525	0.949996		3'UTR	14.7	14.3
YBR267W		biological_process unknown	molecular_function unknown	cellular_component unknown		4.71	0.544732		3'UTR	1.4	1.3
YBR010W	HHT1	chromatin assembly/disassembly	DNA binding activity	nucleus*	soluble	4.68	1.09063	puf5	3'UTR	19	45.5
YBR106W	PHO88	phosphate transport	phosphate transporter activity	membrane	membrane	4.6525	0.557636			6.8	19.8
YJL122W		biological_process unknown	molecular_function unknown	not yet annotated		4.5275	0.626438		3'UTR	2.8	2
YGR063C	SPT4	regulation of transcription, DNA-dependent*	Pol II transcription elongation factor activity	nucleus*	soluble	4.525	1.01353		3'UTR	1.4	3.8
YNL111C	CYB5	sterol biosynthesis	electron transporter activity	microsome	membrane	4.2375	0.53269		3'UTR	2.6	2
YOR294W	RRS1	rRNA processing*	27S preribosomal processing	nucleolus	soluble	4.16	0.589972		3'UTR	2.1	1.8
YBR252W	DUT1	pyrimidine deoxyribonucleoside triphosphate catabolism	dUTP pyrophosphatase activity	cellular_component unknown		4.1425	0.956987	puf2	3'UTR	2	4.7
YDR399W	HPT1	purine nucleotide biosynthesis	hypoxanthine phosphoribosyltransferase activity	cellular_component unknown		4.1075	0.651479		3'UTR, ORF	4.3	10.4
YLR435W	TSR2	biological_process unknown	molecular_function unknown	cellular_component unknown		3.9925	0.646136		3'UTR	1.2	1.9
YOL080C	REX4	rRNA processing*	3'-5' exonuclease activity	nucleus	soluble	3.9325	0.606156		3'UTR	1.7	0.8
YGR064W		biological_process unknown	molecular_function unknown	cellular_component unknown		3.9275	0.751992			1.3	0.2
YBL039C	URA7	phospholipid biosynthesis*	CTP synthase activity	cytosol	soluble	3.885	0.4999		3'UTR	4.1	6.6
YDL208W	NHP2	rRNA modification*	RNA binding activity	small nuclear ribonucleoprotein complex	soluble	3.8475	0.935784		3'UTR	nd	13.4
YAL059W	ECM1	cell wall organization and biogenesis	molecular_function unknown	cellular_component unknown		3.8375	0.61792		3'UTR	1.6	3.4
YBR034C	HMT1	mRNA-nucleus export*	protein-arginine N-methyltransferase activity	nucleus	soluble	3.725	0.385443	puf5	3'UTR	4.7	3.4
YDL189W	RBS1	biological_process unknown	molecular_function unknown	cellular_component unknown		3.7125	0.307287		3'UTR	0.9	0.9
YDR071C		biological_process unknown	molecular_function unknown	cellular_component unknown		3.69	0.749088		3'UTR, ORF	3.8	6.1
YJL111W	CCT7	protein folding*	chaperone activity	cytoplasm*	soluble	3.58	0.868409		3'UTR	2.4	2.7
YHL038C	CBP2	RNA splicing	pre-mRNA splicing factor activity	mitochondrion	soluble	3.51	0.436272		ORF	0.6	0.6
YKR081C	RPF2	ribosomal large subunit assembly and maintenance*	rRNA binding activity*	nucleolus	soluble	3.5	1.11089		3'UTR	2.1	3.7
YPR187W	RPO26	transcription from Pol II promoter*	DNA-directed RNA polymerase activity	DNA-directed RNA polymerase III complex*	soluble	3.4775	0.659918		3'UTR	3.4	nd
YHR052W	CIC1	protein catabolism	protein binding activity, bridging	nucleolus*	soluble	3.46	0.508003		3'UTR	3	2.5
YBL024W	NCL1	tRNA methylation	tRNA (cytosine-5-)-methyltransferase activity	nucleolus	soluble	3.42	0.406202		3'UTR	2.7	1.5
YKL172W	EBP2	rRNA processing	molecular_function unknown	nucleolus	soluble	3.4	0.617144		3'UTR	4.9	nd
YNL031C	HHT2	chromatin assembly/disassembly	DNA binding activity	nucleosome	soluble	3.385	0.315647	puf5	3'UTR	13.8	37.6
YNL213C		mitochondrion organization and biogenesis	molecular_function unknown	mitochondrion	soluble	3.2375	0.694136		3'UTR	1	0.6
YPL043W	NOP4	rRNA processing	RNA binding activity	nucleolus	soluble	3.22	0.584637		3'UTR	2.1	1.9
YAL021C	CCR4	regulation of transcription from Pol II promoter*	3'-5' exoribonuclease activity	nucleus	soluble	3.17	0.273861		3'UTR	1.5	1.3
YBL003C	HTA2	chromatin assembly/disassembly	DNA binding activity	nucleosome	soluble	3.1275	0.264118	puf2	3'UTR	14.6	24.5
YAL011W	SWC1	biological_process unknown	molecular_function unknown	cellular_component unknown		3.1	0.580632	puf5	3'UTR	1.2	0.4
YDR339C		biological_process unknown	molecular_function unknown	cellular_component unknown		2.995	0.679142		3'UTR	2.1	2.7
YKL164C	PIR1	cell wall organization and biogenesis*	structural constituent of cell wall	cell wall	membrane	2.9325	0.467431		3'UTR	5.5	14.6
YML080W	DUS1	tRNA modification	tRNA dihydrouridine synthase activity	cellular_component unknown		2.905	0.456253		3'UTR	0.7	1.9
YBR217W	APG12	protein-vacuolar targeting*	molecular_function unknown	membrane fraction	membrane	2.8575	0.623398		ORF	4.5	nd
YBR088C	POL30	lagging strand elongation*	DNA polymerase processivity factor activity	replication fork	soluble	2.8425	1.26913		3'UTR	2.6	5.8
YPL019C	VTC3	vacuole fusion (non-autophagic)	molecular_function unknown	vacuolar membrane	membrane	2.7975	0.643551		3'UTR, ORF	1.8	1.3
YML093W	UTP14	processing of 20S pre-rRNA	snoRNA binding activity	small nucleolar ribonucleoprotein complex	soluble	2.79333	0.562968		3'UTR	1.8	1.6
YLR186W	EMG1	processing of 20S pre-rRNA*	molecular_function unknown	nucleolus	soluble	2.75	1.10854		3'UTR	2.6	1.5
YJL183W	MNN11	protein amino acid glycosylation	alpha-1,6-mannosyltransferase activity	mannosyltransferase complex	membrane	2.75	0.631876			2	3.1
YMR161W	HLJ1	biological_process unknown	molecular_function unknown	cellular_component unknown	membrane	2.72	0.658483	puf5	3'UTR	1	1.1
YML052W	SUR7	sporulation (sensu Saccharomyces)	molecular_function unknown	integral to membrane*	membrane	2.7075	0.733138	puf2, 5	3'UTR	1.6	4
YDL166C	FAP7	response to oxidative stress	molecular_function unknown	nucleus	soluble	2.69667	0.496421		3'UTR	1.2	2.1
YJR069C	HAM1	DNA repair	molecular_function unknown	cellular_component unknown		2.67333	0.245832		3'UTR	2.5	1.8
YNL061W	NOP2	rRNA processing	RNA methyltransferase activity	nucleolus	soluble	2.64	0.66458		3'UTR	2.3	2.1
YCR047C	BUD23	bud site selection	S-adenosylmethionine-dependent methyltransferase activity	cellular_component unknown		2.625	1.21099		3'UTR	0.8	2.4
YOL059W	GPD2	glycerol metabolism	glycerol-3-phosphate dehydrogenase (NAD+) activity	cytosol	soluble	2.6175	0.602571			1.3	1.2
YOL079W		biological_process unknown	molecular_function unknown	integral to membrane		2.605	0.275257			1.4	nd
YDL014W	NOP1	rRNA modification*	methyltransferase activity, GAR family	nucleolus*	soluble	2.5175	0.548354	puf1, 5	3'UTR	5.7	15.2
YNL185C	MRPL19	protein biosynthesis	structural constituent of ribosome	mitochondrial large ribosomal subunit	soluble	2.5025	0.531123	puf3	3'UTR	1.6	nd
YOR281C	PLP2	positive regulation of transcription from Pol II promoter by pheromones	GTPase inhibitor activity	cytoplasm	soluble	2.4825	0.568822		ORF	1.6	1.5
YOL023W	IFM1	translational initiation	translation initiation factor activity	mitochondrion	soluble	2.48	0.513485	puf3, 5	3'UTR	1.4	0.2
YBR009C	HHF1	chromatin assembly/disassembly	DNA binding activity	nucleosome	soluble	2.4375	0.74995	puf5	3'UTR	13.9	17.3
YPL001W	HAT1	chromatin silencing at telomere*	H3/H4 histone acetyltransferase activity	nucleus*	soluble	2.435	0.588586			1.8	0.9
YGL070C	RPB9	transcription from Pol II promoter	DNA-directed RNA polymerase activity	DNA-directed RNA polymerase II, core complex	soluble	2.425	0.721318		3'UTR	0	3.3
YBL087C	RPL23A	protein biosynthesis	structural constituent of ribosome	cytosolic large ribosomal subunit (sensu Eukarya)	soluble	2.415	0.508101			11.9	54.2
YOL060C	MAM3	mitochondrion organization and biogenesis	hemolysin activity	cellular_component unknown		2.3975	0.674358			0.7	0.7
YLR175W	CBF5	rRNA modification*	pseudouridylate synthase activity	small nucleolar ribonucleoprotein complex	soluble	2.385	0.59808		3'UTR	8.2	11.2
YNL113W	RPC19	transcription from Pol I promoter*	DNA-directed RNA polymerase activity	DNA-directed RNA polymerase III complex*	soluble	2.3575	0.861564		3'UTR	2.4	5.5
YOR299W	BUD7	bud site selection	molecular_function unknown	cellular_component unknown		2.3375	0.44485			1	0.7
YPL044C		biological_process unknown	molecular_function unknown	cellular_component unknown		2.3225	0.56559			2	nd
YBR089W		biological_process unknown	molecular_function unknown	cellular_component unknown		2.3125	1.17025			2.2	0.1
YNL067W	RPL9B	protein biosynthesis	structural constituent of ribosome	cytosolic large ribosomal subunit (sensu Eukarya)	soluble	2.2975	0.6034		3'UTR	20.9	14.6
YNR053C	NOG2	mRNA splicing	GTPase activity	nucleus	soluble	2.2875	0.513314		3'UTR	2.9	5.2
YAL025C	MAK16	ribosomal large subunit biogenesis*	molecular_function unknown	nucleolus	soluble	2.27	0.578043		3'UTR	1.4	2.5
YKR035W-A	DID2	protein-vacuolar targeting	molecular_function unknown	cytoplasm	soluble	2.25	0.9531		3'UTR	nd	nd
YER126C	NSA2	ribosomal large subunit biogenesis	molecular_function unknown	nucleolus	soluble	2.2425	0.451765		3'UTR	2.6	3.4
YGL078C	DBP3	35S primary transcript processing*	ATP dependent RNA helicase activity	nucleolus	soluble	2.2425	0.399948		3'UTR	0	5.7
YBR247C	ENP1	processing of 20S pre-rRNA*	snoRNA binding activity	nucleolus	soluble	2.23333	0.083865		3'UTR	1.1	nd
YEL042W	GDA1	protein amino acid glycosylation	guanosine diphosphatase activity*	Golgi apparatus	membrane	2.205	0.634639		3'UTR	nd	nd
YDR101C	ARX1	ribosomal large subunit biogenesis	molecular_function unknown	cellular_component unknown		2.2025	0.488151		3'UTR	1.7	1.3
YHR175W	CTR2	intracellular copper ion transport*	copper uptake transporter activity*	vacuolar membrane (sensu Fungi)	membrane	2.2	0.466548		3'UTR	2	2.7
YPL146C		biological_process unknown	molecular_function unknown	nucleus*	soluble	2.19	0.591439		3'UTR	0.9	1
YNL114C		biological_process unknown	molecular_function unknown	cellular_component unknown		2.19	0.71054			2.9	0.6
YKR061W	KTR2	N-linked glycosylation*	mannosyltransferase activity	Golgi apparatus	membrane	2.1425	0.673863			2.7	1
YJL087C	TRL1	tRNA splicing*	RNA ligase (ATP) activity	nucleoplasm*	soluble	2.14	0.858176		3'UTR	1.2	0.6
YNL030W	HHF2	chromatin assembly/disassembly	DNA binding activity	nucleosome	soluble	2.1375	0.519832	puf5	3'UTR	0.8	0.6
YHR195W	NVJ1	microautophagy	protein binding activity	nuclear membrane	membrane	2.125	0.803596	puf5		18.5	23.9
YJR063W	RPA12	transcription from Pol I promoter	DNA-directed RNA polymerase activity	DNA-directed RNA polymerase I complex	soluble	2.125	0.857146		3'UTR	0.7	nd
YNL110C	NOP15	ribosomal large subunit biogenesis	molecular_function unknown	nucleolus	soluble	2.12	0.759868		3'UTR	3.3	1.8
YKR035C		biological_process unknown	molecular_function unknown	cellular_component unknown		2.0675	1.02763			3.9	4.7
YKL163W	PIR3	cell wall organization and biogenesis	structural constituent of cell wall	cell wall	membrane	2.0675	0.263233			3.9	2.5
YDR329C	PEX3	peroxisome organization and biogenesis*	molecular_function unknown	peroxisomal membrane	membrane	2.0625	0.548171			1.4	0.3
YIL121W	QDR2	biological_process unknown	molecular_function unknown	cellular_component unknown		2.0625	0.558711	puf5		0.9	0.7
YGR272C		biological_process unknown	molecular_function unknown	cellular_component unknown		2.04	0.622174			0.7	0.8
YMR126C	DLT1	biological_process unknown	molecular_function unknown	cellular_component unknown		2.0275	0.708961	puf5	3'UTR	3.4	1.8
YGL097W	SRM1	rRNA-nucleus export*	signal transducer activity	nucleus	soluble	1.9975	0.62516		3'UTR	1.4	0.6
YOR140W	SFL1	negative regulation of transcription from Pol II promoter	specific transcriptional repressor activity	nuclear chromosome	soluble	1.99	0.627535	puf2, 5	ORF	1.1	2.4
YLR009W	RLP24	ribosomal large subunit biogenesis	molecular_function unknown	nucleolus	soluble	1.975	0.968736		3'UTR	0.8	nd
YDR346C	SGI1	biological_process unknown	molecular_function unknown	cellular_component unknown		1.97	0.425441			3.6	4.2
YCR051W		biological_process unknown	molecular_function unknown	cellular_component unknown		1.94	0.59649		3'UTR	3.2	2.9
YPR041W	TIF5	regulation of translational initiation*	translation initiation factor activity*	cytosolic small ribosomal subunit (sensu Eukarya)	soluble	1.92	0.519872		3'UTR	0.8	2.8
YKL051W		actin cytoskeleton organization and biogenesis*	molecular_function unknown	cellular_component unknown		1.9075	0.571686	puf2	3'UTR	4.6	3.6
YPR101W	SNT309	mRNA splicing	molecular_function unknown	spliceosome complex, nucleus	soluble	1.8925	0.648453	puf5	3'UTR	0.7	0.6
YDR496C	PUF6	biological_process unknown	molecular_function unknown	cellular_component unknown		1.8925	0.530495		3'UTR	3	2.9
YDR224C	HTB1	chromatin assembly/disassembly	DNA binding activity	nucleosome	soluble	1.86	0.448776		3'UTR	1.2	0.9
YOR145C	PNO1	protein complex assembly	chaperone activity	nucleolus	soluble	1.8525	0.645207		3'UTR	26.4	21.2
YDR225W	HTA1	chromatin assembly/disassembly	DNA binding activity	nucleosome	soluble	1.845	0.30271	puf5		2.4	3.6
YKL181W	PRS1	histidine biosynthesis*	ribose-phosphate pyrophosphokinase activity	cellular_component unknown		1.8175	0.612611			17.3	29.1
YDL227C	HO	mating-type switching/recombination*	endonuclease activity	nucleus	soluble	1.8075	0.811927		3'UTR	3.7	nd
YNL002C	RLP7	ribosomal large subunit biogenesis*	rRNA binding activity	nucleolus	soluble	1.7975	0.636311		3'UTR	1.8	1.1
YPL081W	RPS9A	protein biosynthesis*	structural constituent of ribosome	cytoplasm*	soluble	1.7975	0.51299		3'UTR	4.2	1.9
YHR089C	GAR1	rRNA modification*	RNA binding activity, GAR family	nucleolus*	soluble	1.79	0.661438		3'UTR	8	4.5
YLR259C	HSP60	protein folding*	heat shock protein activity	mitochondrion		1.79	0.550697	puf3		3.1	14.4
YBR143C	SUP45	translational termination	translation release factor activity, codon specific	cytosol	soluble	1.7875	0.370349		3'UTR	5.4	9.9
YBL028C		biological_process unknown	molecular_function unknown	cellular_component unknown		1.78	0.605255	puf5	3'UTR	6.3	6.1
YNL184C		biological_process unknown	molecular_function unknown	cellular_component unknown		1.7775	0.53369	puf3		3.3	0.8
YOR243C	PUS7	pseudouridine synthesis	pseudouridine synthase activity	cellular_component unknown		1.7775	0.415321		3'UTR	1.6	0.4
YKL009W	MRT4	ribosomal large subunit biogenesis	molecular_function unknown	cellular_component unknown		1.76	0.714749		3'UTR	1.9	1.9
YHR143W-A	RPC10	transcription from Pol II promoter*	DNA-directed RNA polymerase activity	DNA-directed RNA polymerase III complex*	soluble	1.75	0.708425		3'UTR	4.6	11.2
YBR271W		biological_process unknown	molecular_function unknown	cellular_component unknown		1.75	0.341663			0.9	0.7
YOR157C	PUP1	ubiquitin-dependent protein catabolism	proteasome endopeptidase activity	20S core proteasome complex	soluble	1.745	0.435163			2.7	6.5
YGL014W	PUF4	mRNA catabolism, deadenylation-dependent*	mRNA binding activity	cellular_component unknown		1.7375	0.191551	puf2	3'UTR	2.3	3.5
YPL253C	VIK1	microtubule-based process	microtubule motor activity	spindle pole body*	soluble	1.735	0.388887		ORF	1.4	0.7
YGR019W	UGA1	nitrogen utilization	4-aminobutyrate aminotransferase activity	intracellular	soluble	1.73	0.285073			1.2	0.3
YOL061W	PRS5	histidine biosynthesis*	ribose-phosphate pyrophosphokinase activity	cellular_component unknown		1.7225	0.407298			0.8	0.9
YGR187C	HGH1	biological_process unknown	molecular_function unknown	cellular_component unknown		1.6775	0.652604		3'UTR	2.1	nd
YMR123W	PKR1	biological_process unknown	molecular_function unknown	cellular_component unknown		1.6725	0.957614		3'UTR	1.3	2.2
YOR210W	RPB10	transcription from Pol II promoter*	DNA-directed RNA polymerase activity	DNA-directed RNA polymerase III complex*	soluble	1.6575	0.79793			1.8	nd
YIR004W	DJP1	peroxisome matrix protein import	co-chaperone activity	cytosol	soluble	1.6525	0.68349		3'UTR	2.2	9.8
YHR104W	GRE3	response to stress*	aldehyde reductase activity	cellular_component unknown		1.6525	0.6583		ORF	1.2	1
YMR149W	SWP1	N-linked glycosylation	dolichyl-diphospho-oligosaccharide-protein glycosyltransferase activity	oligosaccharyl transferase complex	soluble	1.65	0.697854			1.2	1.5
YIL096C		biological_process unknown	molecular_function unknown	cellular_component unknown		1.6375	0.435766		3'UTR	2.1	3.1
YDL031W	DBP10	35S primary transcript processing*	ATP dependent RNA helicase activity	nucleolus	soluble	1.625	0.330404		3'UTR	1.8	1
YNL044W	YIP3	ER to Golgi transport	molecular_function unknown	COPII-coated vesicle	membrane	1.625	0.592874		3'UTR	2.1	nd
YOR252W		biological_process unknown	molecular_function unknown	cellular_component unknown		1.625	0.602356		3'UTR	1.9	5.5
YLR417W	VPS36	protein-vacuolar targeting*	regulator of G-protein signaling activity	endosome	membrane	1.6225	0.440407			3.2	0.4
YMR300C	ADE4	purine base metabolism	amidophosphoribosyltransferase activity	cellular_component unknown		1.6225	0.247302		3'UTR	0.7	0.3
YPR143W		biological_process unknown	molecular_function unknown	cellular_component unknown		1.62	0.548635		3'UTR	nd	1.1
YDR315C	IPK1	myo-inositol metabolism	inositol/phosphatidylinositol kinase activity	nucleus	soluble	1.6125	0.341309		3'UTR	2.3	2.4
YLR168C		biological_process unknown	molecular_function unknown	cellular_component unknown		1.6125	0.620504			1	0.3
YDR308C	SRB7	transcription from Pol II promoter	RNA polymerase II transcription mediator activity	mediator complex	soluble	1.6025	0.129711		3'UTR	1.4	nd
YMR044W	IOC4	chromatin modeling	protein binding activity	nucleus	soluble	1.5975	1.03032	puf5	3'UTR	1.4	1.2
YBL002W	HTB2	chromatin assembly/disassembly	DNA binding activity	nucleosome	soluble	1.5975	0.534439	puf5		16.2	8.4
YDL201W	TRM8	tRNA methylation	tRNA (guanine-N7-)-methyltransferase activity	cellular_component unknown		1.5875	0.714347			1.4	0.9
YNL174W		biological_process unknown	molecular_function unknown	cellular_component unknown		1.5675	0.304124			2.7	1.7
YIL157C		biological_process unknown	molecular_function unknown	cellular_component unknown		1.5625	0.447092	puf5		3.5	0.4
YJL158C	CIS3	cell wall organization and biogenesis	structural constituent of cell wall	plasma membrane*	membrane	1.5175	0.610048		3'UTR	1.3	2.5
YHR209W		biological_process unknown	S-adenosylmethionine-dependent methyltransferase activity	cellular_component unknown		1.5	0.492747		ORF	10.9	20.4
YBR061C	TRM7	protein biosynthesis*	tRNA methyltransferase activity	cytoplasm	soluble	1.4975	0.421456		3'UTR	0.7	0.4
YPR137W	RRP9	rRNA modification*	snoRNA binding activity	small nucleolar ribonucleoprotein complex*	soluble	1.48	0.361755		3'UTR	1.4	1
YOR146W		biological_process unknown	molecular_function unknown	cellular_component unknown		1.4675	0.370799			1.3	1.5
YJR103W	URA8	phospholipid biosynthesis*	CTP synthase activity	cytosol	soluble	1.465	1.26629			2.5	0.2
YBR272C	HSM3	mismatch repair	molecular_function unknown	cellular_component unknown		1.4625	0.288487			0	0.8
YPL196W	OXR1	response to oxidative stress	molecular_function unknown	cellular_component unknown		1.4575	0.706417		3'UTR	1.2	0.4
YKL113C	RAD27	DNA repair*	flap endonuclease activity	nucleus	soluble	1.4475	0.467716		3'UTR	0.9	0.4
YMR250W	GAD1	response to oxidative stress*	glutamate decarboxylase activity	cytoplasm	soluble	1.4425	0.31753	puf5		1.1	1.3
YJL147C		biological_process unknown	molecular_function unknown	cellular_component unknown		1.44	0.310483	puf5		0.6	0.4
YGL029W	CGR1	rRNA processing*	molecular_function unknown	nucleolus	soluble	1.4325	0.674654		3'UTR	0.9	0.2
YGL161C	YIP5	biological_process unknown	RAB interactor activity	membrane	membrane	1.4325	0.328164		3'UTR	3.8	3.6
YKL201C	MNN4	response to stress*	molecular_function unknown	cellular_component unknown		1.425	0.437379	puf5	3'UTR	1.1	5.4
YER049W		biological_process unknown	molecular_function unknown	cellular_component unknown		1.4125	0.385346	puf5	3'UTR	1.4	0.3
YKL191W	DPH2	peptidyl-diphthamide biosynthesis from peptidyl-histidine	molecular_function unknown	cellular_component unknown		1.4025	0.249983			1.8	3.6
YCL054W	SPB1	rRNA processing	RNA methyltransferase activity	nucleolus	soluble	1.4	0.4784		3'UTR	1	3.4
YMR275C	BUL1	protein monoubiquitination*	molecular_function unknown	plasma membrane	membrane	1.39	0.425911		ORF	2.2	1.8
YML022W	APT1	AMP biosynthesis	adenine phosphoribosyltransferase activity	cellular_component unknown		1.39	0.675722	puf5	3'UTR	3.2	5.7
YLR026C	SED5	ER to Golgi transport*	t-SNARE activity	Golgi cis-face	membrane	1.3875	0.518869	puf3	3'UTR	0.6	0.6
YNL043C		biological_process unknown	molecular_function unknown	cellular_component unknown		1.3875	0.420823			0.9	0.4
YDR429C	TIF35	translational initiation	translation initiation factor activity	eukaryotic translation initiation factor 3 complex	soluble	1.385	0.379868		3'UTR	2.2	0.2
YGR159C	NSR1	rRNA processing*	RNA binding activity, GAR family	nucleolus	soluble	1.3725	0.521368		3'UTR	5.7	8.3
YNL261W	ORC5	DNA replication initiation*	ATPase activity*	origin recognition complex, nucleosome	soluble	1.3625	0.413471		ORF	2.2	12.2
YIL118W	RHO3	establishment of cell polarity (sensu Saccharomyces)*	signal transducer activity*	intracellular	soluble	1.3625	0.572793			4.4	2
YHR058C	MED6	transcription from Pol II promoter	RNA polymerase II transcription mediator activity	mediator complex	soluble	1.3575	0.437598	puf5	3'UTR	1.3	0.7
YGL130W	CEG1	mRNA capping	mRNA guanylyltransferase activity	nucleus	soluble	1.3525	0.226918		3'UTR, ORF	0.7	0.7
YNL064C	YDJ1	protein-mitochondrial targeting	chaperone regulator activity*	cytosol	soluble	1.33	0.289252		3'UTR	0.7	1
YOL136C	PFK27	fructose 2,6-bisphosphate metabolism*	6-phosphofructo-2-kinase activity	cytoplasm	soluble	1.3275	0.428593			4.8	14
YPR142C		biological_process unknown	molecular_function unknown	cellular_component unknown		1.3225	0.745313			1.6	1.7
YBR167C	POP7	rRNA processing*	ribonuclease P activity*	ribonuclease mitochondrial RNA processing complex*	soluble	1.3175	0.318473		3'UTR	1.7	nd
YGR160W		biological_process unknown	molecular_function unknown	cellular_component unknown		1.3175	0.604228			0.9	0.6
YDL121C		biological_process unknown	molecular_function unknown	endoplasmic reticulum	soluble	1.3125	0.347599			12.7	0.2
YBR133C	HSL7	G2/M transition of mitotic cell cycle*	protein-arginine N-methyltransferase activity	bud neck	soluble	1.3125	0.182094		3'UTR, ORF	0.8	1.3
YJR129C		biological_process unknown	molecular_function unknown	not yet annotated		1.305	0.262996			1.6	1.8
YBL042C	FUI1	uridine transport	uridine transporter activity	plasma membrane	membrane	1.3025	0.209026			0.6	0.2
YGR048W	UFD1	ubiquitin-dependent protein catabolism*	protein binding activity	endoplasmic reticulum	membrane	1.3025	0.669695			0.8	2.5
YKL195W		biological_process unknown	molecular_function unknown	cellular_component unknown		1.29	0.206398			nd	nd
YFL017W-A	SMX2	mRNA splicing	pre-mRNA splicing factor activity	small nuclear ribonucleoprotein complex	soluble	1.2825	0.388276		3'UTR	1.4	1.9
YAL055W	PEX22	protein-peroxisome targeting	molecular_function unknown	peroxisome	soluble	1.27	0.505041	puf5		1.6	nd
YOL139C	CDC33	translational initiation*	translation initiation factor activity	nucleus*	soluble	1.265	0.620457			0.8	0.8
YGR288W	MAL13	regulation of transcription, DNA-dependent*	transcription factor activity	nucleus	soluble	1.2625	0.425549			7.5	15.6
YKL174C		biological_process unknown	molecular_function unknown	not yet annotated		1.26	0.593464			0.8	0.1
YMR194W	RPL36A	protein biosynthesis	structural constituent of ribosome*	cytosolic large ribosomal subunit (sensu Eukarya)	soluble	1.25	0.508396		3'UTR	0.8	1.2
YDR388W	RVS167	endocytosis*	cytoskeletal protein binding activity	actin cortical patch (sensu Saccharomyces)	soluble	1.24	0.362307		ORF	7.2	14
YPL107W		biological_process unknown	molecular_function unknown	cellular_component unknown		1.2275	0.31213		3'UTR	2	4.5
YOR117W	RPT5	ubiquitin-dependent protein catabolism	ATPase activity*	19S proteasome regulatory particle*	soluble	1.2225	0.350179		3'UTR	1.3	0.4
YDR463W	STP1	positive regulation of transcription from Pol II promoter*	specific RNA polymerase II transcription factor activity	nucleus	soluble	1.215	0.221284		3'UTR	2.2	2.8
YLR284C	ECI1	fatty acid beta-oxidation	dodecenoyl-CoA delta-isomerase activity	peroxisome	soluble	1.21333	0.210317		3'UTR	1.3	0.7
YNL151C	RPC31	transcription from Pol III promoter	DNA-directed RNA polymerase activity	DNA-directed RNA polymerase III complex	soluble	1.2125	0.585797	puf5		1.2	0.3
YLR017W	MEU1	glutamate biosynthesis	molecular_function unknown	cytoplasm	soluble	1.2125	0.429835		3'UTR	2	2.9
YKL007W	CAP1	cell wall organization and biogenesis*	F-actin capping activity	actin cortical patch (sensu Saccharomyces)*	soluble	1.21	0.379122		3'UTR	2.4	3.4
YGR191W	HIP1	manganese ion transport*	histidine transporter activity	plasma membrane	membrane	1.2075	0.380559		3'UTR	3.9	1.5
YMR193C-A		biological_process unknown	molecular_function unknown	cellular_component unknown		1.2025	0.314576			1.1	5.2
YDR419W	RAD30	DNA repair*	eta DNA polymerase activity	replication fork	soluble	1.2	0.3005		3'UTR	2	nd
YLR068W	FYV7	biological_process unknown	molecular_function unknown	cellular_component unknown		1.2	0.572364		3'UTR	0.7	0.2
YOR206W	NOC2	ribosome nucleus export*	molecular_function unknown	nucleus	soluble	1.1975	0.329482		3'UTR	3.9	1.2
YMR290C	HAS1	biological_process unknown	molecular_function unknown	nucleolus*	soluble	1.1925	0.612121		3'UTR	3.4	2.7
YOL156W	HXT11	hexose transport	glucose transporter activity*	plasma membrane	membrane	1.175	0.297377		3'UTR	2.7	1.8
YOR089C	VPS21	protein-vacuolar targeting*	GTPase activity*	late endosome	membrane	1.17	0.316228		3'UTR	0.3	nd
YLL035W	GRC3	cell growth and/or maintenance	molecular_function unknown	cellular_component unknown		1.16667	0.161967		3'UTR	1.3	2.4
YDR370C		biological_process unknown	molecular_function unknown	not yet annotated		1.1625	0.439877		3'UTR	1.1	0.6
YLR138W	NHA1	monovalent inorganic cation homeostasis	cation:cation antiporter activity	plasma membrane	membrane	1.16	0.243858			0.9	0.7
YHR201C	PPX1	polyphosphate metabolism	exopolyphosphatase activity	cytoplasm	soluble	1.1575	0.316899		3'UTR	1.7	0.7
YOR084W		peroxisome organization and biogenesis	lipase activity	peroxisomal matrix	soluble	1.1475	0.485618		3'UTR, ORF	0.9	0.7
										610.9	803.8
										9	39.6
										619.9	843.4
